# Supplementary material for: Total workload and recovery in relation to worktime reduction: a randomised controlled intervention study with time-use data
Source: PubMed Central journal article supplement — Occup Environ Med. 2017 Nov 28;75(3):218–26. doi: 10.1136/oemed-2017-104592 (PMC5869453; doi:10.1136/oemed-2017-104592), 2017-11-28
Supplement: oemed-2017-104592supp001.pdf [file oemed-2017-104592supp001.pdf]

**SUPPLEMENTARY FILE**

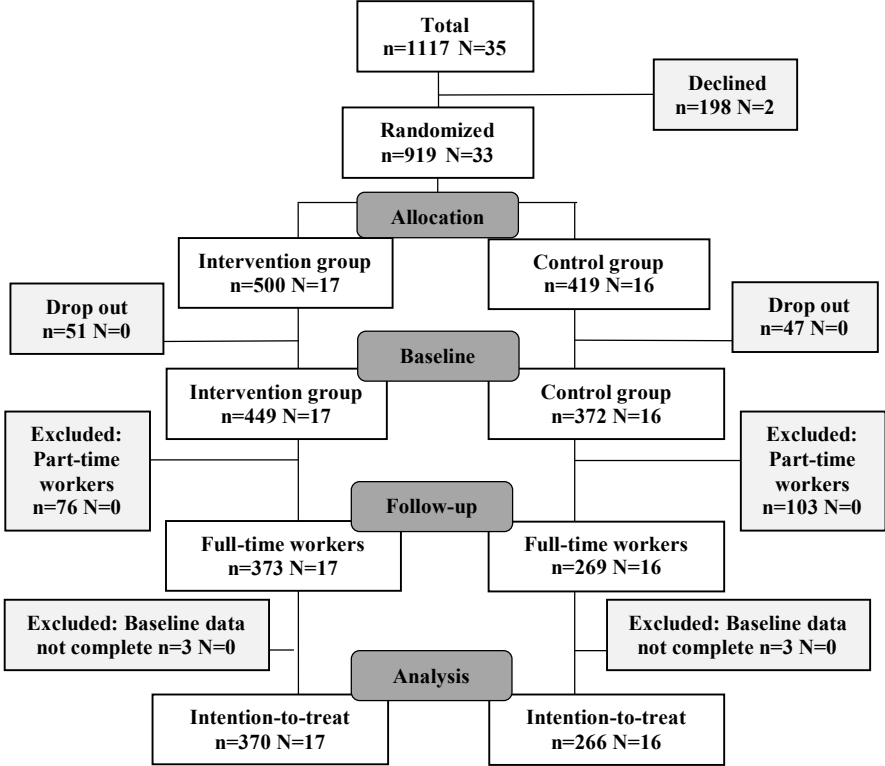

**Supplement figure A. Flow chart of the inclusion procedure based on an intention-to-treat approach.**  
(n=number of individuals; N=number of workplaces)

**Supplement table A. Data on reported workload and recovery (in hours) at the three measurement points and results from the multilevel mixed model in terms of the interactions between group, time and having children living at home (1 yes, 0 no).**

| Activities<br>(hours)          | Group          | Baseline                                 |                                             | 9 months                                 |                                             | 18 months                                |                                             | Interaction effects<br>Group*Time*Children |                |              |
|--------------------------------|----------------|------------------------------------------|---------------------------------------------|------------------------------------------|---------------------------------------------|------------------------------------------|---------------------------------------------|--------------------------------------------|----------------|--------------|
|                                |                | Children<br>Mean (standard<br>deviation) | No children<br>Mean (standard<br>deviation) | Children<br>Mean (standard<br>deviation) | No children<br>Mean (standard<br>deviation) | Children<br>Mean (standard<br>deviation) | No children<br>Mean (standard<br>deviation) | Coefficient                                | C. I.<br>Lower | 95%<br>Upper |
| <b>Paid work workdays</b>      | I <sup>†</sup> | 7:57 (1:12)                              | 8:01 (1:09)                                 | 6:25 (1:07)                              | 6:46 (1:09)                                 | 6:30 (0:59)                              | 6:18 (1:07)                                 | 0.18                                       | -0.08          | 0.44         |
|                                | C <sup>†</sup> | 8:14 (1:16)                              | 8:09 (1:04)                                 | 8:04 (1:18)                              | 8:09 (1:03)                                 | 7:57 (1:20)                              | 8:08 (1:14)                                 |                                            |                |              |
| <b>Non-Paid work workdays</b>  | I              | 2:16 (1:08)                              | 1:01 (0:40)                                 | 2:44 (1:25)                              | 1:14 (0:58)                                 | 2:41 (1:28)                              | 1:23 (1:01)                                 | 0.09                                       | -0.14          | 0.32         |
|                                | C              | 2:18 (1:18)                              | 1:07 (0:59)                                 | 2:08 (1:18)                              | 0:59 (0:59)                                 | 2:01 (1:17)                              | 1:05 (0:57)                                 |                                            |                |              |
| <b>Total workload workdays</b> | I              | 10:13 (1:22)                             | 9:02 (1:11)                                 | 9:10 (1:43)                              | 8:01 (1:21)                                 | 9:12 (1:46)                              | 7:42 (1:17)                                 | 0.25                                       | -0.04          | 0.54         |
|                                | C              | 10:33 (1:22)                             | 9:16 (1:16)                                 | 10:12 (1:29)                             | 9:08 (1:14)                                 | 9:59 (1:25)                              | 9:13 (1:20)                                 |                                            |                |              |
| <b>Recovery workdays</b>       | I              | 6:06 (1:25)                              | 7:02 (1:21)                                 | 6:59 (1:37)                              | 7:52 (1:31)                                 | 6:59 (1:39)                              | 8:05 (1:28)                                 | -0.18                                      | -0.48          | 0.12         |
|                                | C              | 5:47 (1:30)                              | 6:55 (1:36)                                 | 6:14 (1:31)                              | 7:10 (1:33)                                 | 6:20 (1:26)                              | 6:56 (1:39)                                 |                                            |                |              |
| <b>Paid work days off</b>      | I              | 0:16 (0:49)                              | 0:09 (0:27)                                 | 0:06 (0:30)                              | 0:17 (0:50)                                 | 0:11 (0:44)                              | 0:13 (0:37)                                 | 0.08                                       | -0.11          | 0.27         |
|                                | C              | 0:10 (0:30)                              | 0:06 (0:24)                                 | 0:15 (0:52)                              | 0:25 (0:58)                                 | 0:17 (0:49)                              | 0:31 (1:23)                                 |                                            |                |              |
| <b>Non-Paid work days off</b>  | I              | 4:31 (2:30)                              | 2:48 (2:08)                                 | 4:06 (2:31)                              | 2:29 (1:45)                                 | 4:10 (2:30)                              | 2:24 (1:50)                                 | -0.01                                      | -0.53          | 0.52         |
|                                | C              | 3:29 (2:26)                              | 3:03 (1:59)                                 | 4:15 (2:33)                              | 2:43 (2:09)                                 | 4:13 (2:38)                              | 2:53 (2:10)                                 |                                            |                |              |
| <b>Total workload days off</b> | I              | 4:48 (2:31)                              | 2:58 (2:09)                                 | 4:12 (2:32)                              | 2:46 (1:52)                                 | 4:21 (2:32)                              | 2:38 (1:52)                                 | 0.08                                       | -0.45          | 0.60         |
|                                | C              | 4:39 (2:27)                              | 3:09 (2:02)                                 | 4:30 (2:42)                              | 3:09 (2:07)                                 | 4:31 (2:35)                              | 3:24 (2:11)                                 |                                            |                |              |
| <b>Recovery days off</b>       | I              | 9:57 (2:29)                              | 11:17 (2:19)                                | 10:17 (2:48)                             | 11:17 (2:58)                                | 9:52 (2:42)                              | 11:41 (2:41)                                | -0.08                                      | -0.74          | 0.59         |
|                                | C              | 9:33 (3:18)                              | 10:30 (3:32)                                | 10:00 (2:59)                             | 10:34 (3:08)                                | 9:47 (2:31)                              | 10:51 (2:18)                                |                                            |                |              |

† I = Intervention group. C = Control group

**Supplement Table B. Data on reported workload and recovery (in hours) at the three measurement points and results from the multilevel mixed model in terms of the interactions between group, time and sharing household with a partner (1 yes, 0 no).**

| Activities<br>(hours)          | Group          | Baseline                                |                                            | 9 months                                |                                            | 18 months                               |                                            | Interaction effects<br>Group*Time*Partner |                |              |
|--------------------------------|----------------|-----------------------------------------|--------------------------------------------|-----------------------------------------|--------------------------------------------|-----------------------------------------|--------------------------------------------|-------------------------------------------|----------------|--------------|
|                                |                | Partner<br>Mean (standard<br>deviation) | No partner<br>Mean (standard<br>deviation) | Partner<br>Mean (standard<br>deviation) | No partner<br>Mean (standard<br>deviation) | Partner<br>Mean (standard<br>deviation) | No partner<br>Mean (standard<br>deviation) | Coefficient                               | C. I.<br>Lower | 95%<br>Upper |
| <b>Paid work workdays</b>      | I <sup>†</sup> | 7:56 (1:08)                             | 8:06 (1:12)                                | 6:34 (1:08)                             | 6:48 (1:14)                                | 6:29 (1:00)                             | 6:39 (1:19)                                | 0.02                                      | -0.31          | 0.28         |
|                                | C <sup>†</sup> | 8:14 (1:09)                             | 7:53 (1:09)                                | 8:11 (1:12)                             | 7:47 (0:57)                                | 8:08 (1:18)                             | 7:39 (1:07)                                |                                           |                |              |
| <b>Non-Paid work workdays</b>  | I              | 1:47 (1:09)                             | 1:02 (0:40)                                | 2:08 (1:25)                             | 1:19 (1:15)                                | 2:13 (1:25)                             | 1:14 (0:59)                                | 0.20                                      | -0.06          | 0.45         |
|                                | C              | 1:49 (1:18)                             | 1:15 (1:14)                                | 1:41 (1:20)                             | 1:02 (1:00)                                | 1:33 (1:14)                             | 1:19 (1:03)                                |                                           |                |              |
| <b>Total workload workdays</b> | I              | 9:43 (1:22)                             | 9:09 (1:17)                                | 8:42 (1:40)                             | 8:08 (1:36)                                | 8:43 (1:42)                             | 7:54 (1:31)                                | 0.19                                      | -0.14          | 0.52         |
|                                | C              | 10:03 (1:26)                            | 9:09 (1:34)                                | 9:52 (1:31)                             | 8:50 (1:21)                                | 9:41 (1:25)                             | 8:59 (1:18)                                |                                           |                |              |
| <b>Recovery workdays</b>       | I              | 6:29 (1:25)                             | 7:04 (1:22)                                | 7:21 (1:37)                             | 7:48 (1:37)                                | 7:18 (1:38)                             | 7:58 (1:42)                                | -0.00                                     | -0.34          | 0.35         |
|                                | C              | 6:10 (1:39)                             | 7:16 (1:41)                                | 6:30 (1:34)                             | 7:41 (1:42)                                | 6:34 (1:25)                             | 7:29 (1:38)                                |                                           |                |              |
| <b>Paid work days off</b>      | I              | 0:12 (0:37)                             | 0:08 (0:20)                                | 0:08 (0:34)                             | 0:13 (0:37)                                | 0:11 (0:39)                             | 0:13 (0:34)                                | -0.28                                     | -0.49          | -0.07        |
|                                | C              | 0:09 (1:30)                             | 0:16 (1:01)                                | 0:20 (0:54)                             | 0:18 (0:42)                                | 0:27 (1:11)                             | 0:07 (0:21)                                |                                           |                |              |
| <b>Non-Paid work days off</b>  | I              | 3:58 (2:26)                             | 2:38 (2:07)                                | 3:33 (2:19)                             | 2:21 (1:53)                                | 3:37 (2:24)                             | 2:21 (1:46)                                | -0.10                                     | -0.71          | 0.51         |
|                                | C              | 3:58 (2:25)                             | 2:59 (1:21)                                | 3:51 (2:33)                             | 2:07 (1:59)                                | 3:43 (2:35)                             | 2:56 (2:17)                                |                                           |                |              |
| <b>Total workload days off</b> | I              | 4:10 (2:26))                            | 2:46 (2:08)                                | 3:41 (2:19)                             | 2:35 (2:00)                                | 3:48 (2:25)                             | 2:35 (1:47)                                | -0.40                                     | -1.00          | 0.20         |
|                                | C              | 4:07 (2:27)                             | 3:15 (2:22)                                | 4:12 (2:37)                             | 2:25 (1:59)                                | 4:10 (2:32)                             | 3:04 (2:14)                                |                                           |                |              |
| <b>Recovery days off</b>       | I              | 10:21 (2:24)                            | 11:24 (2:36)                               | 10:40 (2:54)                            | 11:42 (2:30)                               | 10:35 (2:48)                            | 11:51 (1:53)                               | 0.18                                      | -0.60          | 0.95         |
|                                | C              | 9:55 (3:27)                             | 10:40 (3:26)                               | 10:04 (3:10)                            | 11:33 (3:09)                               | 10:19 (2:32)                            | 11:21 (2:43)                               |                                           |                |              |

† I = Intervention group. C = Control group

**Supplement table C. Data on reported workload and recovery (in hours) at the three measurement points and results from the multilevel mixed model in terms of the interactions between group, time and living alone with children (1 yes, 0 no).**

| Activities<br>(hours)          | Group          | Baseline                  |                           | 9 months                  |                           | 18 months                 |                           | Interaction effects<br>Group*Time*Alone with children |           |       |
|--------------------------------|----------------|---------------------------|---------------------------|---------------------------|---------------------------|---------------------------|---------------------------|-------------------------------------------------------|-----------|-------|
|                                |                | Alone with children       | Not alone with children   | Alone with children       | Not alone with children   | Alone with children       | Not alone with children   | Coefficient                                           | C. I. 95% |       |
|                                |                | Mean (standard deviation) |                                                       | Lower     | Upper |
| <b>Paid work workdays</b>      | I <sup>†</sup> | 8:07 (0:37)               | 7:56 (1:10)               | 6:22 (1:28)               | 6:35 (1:09)               | 6:27 (0:50)               | 6:28 (1:04)               | -0.08                                                 | -0.80     | 0.64  |
|                                | C <sup>†</sup> | 7:39 (1:09)               | 8:14 (1:10)               | 7:53 (0:29)               | 8:12 (1:13)               | 7:37 (0:38)               | 8:08 (1:22)               |                                                       |           |       |
| <b>Non-Paid work workdays</b>  | I              | 1:38 (0:40)               | 1:46 (1:10)               | 2:51 (1:45)               | 2:06 (1:27)               | 2:08 (1:14)               | 2:11 (1:27)               | 0.38                                                  | -0.24     | 1.01  |
|                                | C              | 2:29 (1:48)               | 1:47 (1:21)               | 2:24 (1:18)               | 1:34 (1:17)               | 2:01 (1:06)               | 1:33 (1:13)               |                                                       |           |       |
| <b>Total workload workdays</b> | I              | 9:46 (1:04)               | 9:43 (1:24)               | 9:13 (2:00)               | 8:41 (1:43)               | 8:36 (1:35)               | 8:39 (1:45)               | 0.28                                                  | -0.50     | 1.07  |
|                                | C              | 10:08 (0:56)              | 10:01 (1:30)              | 10:18 (1:27)              | 9:46 (1:29)               | 9:38 (0:56)               | 9:41 (1:28)               |                                                       |           |       |
| <b>Recovery workdays</b>       | I              | 6:51 (1:44)               | 6:29 (1:27)               | 6:50 (1:57)               | 7:21 (1:41)               | 7:05 (1:25)               | 7:20 (1:42)               | -0.49                                                 | -1.33     | 0.34  |
|                                | C              | 6:19 (0:38)               | 6:15 (1:44)               | 5:53 (1:27)               | 6:40 (1:41)               | 6:33 (1:19)               | 6:36 (1:35)               |                                                       |           |       |
| <b>Paid work days off</b>      | I              | 0:00 (0:00)               | 0:12 (0:39)               | 0:08 (0:25)               | 0:10 (0:37)               | 0:03 (0:10)               | 0:11 (0:39)               | 0.20                                                  | -0.30     | 0.69  |
|                                | C              | 0:08 (0:12)               | 0:07 (0:29)               | 0:00 (0:00)               | 0:20 (0:54)               | 0:05 (0:15)               | 0:24 (1:09)               |                                                       |           |       |
| <b>Non-Paid work days off</b>  | I              | 3:11 (2:18)               | 3:53 (2:31)               | 4:10 (3:46)               | 3:30 (2:19)               | 4:06 (2:08)               | 3:34 (2:26)               | 0.76                                                  | -0.66     | 2.17  |
|                                | C              | 3:45 (1:33)               | 4:00 (2:26)               | 3:07 (2:58)               | 3:38 (2:29)               | 3:50 (3:18)               | 3:51 (2:32)               |                                                       |           |       |
| <b>Total workload days off</b> | I              | 3:11 (2:18)               | 4:05 (2:32)               | 4:18 (3:37)               | 3:40 (2:20)               | 4:10 (2:06)               | 3:46 (2:28)               | 0.96                                                  | 0.44      | 2.36  |
|                                | C              | 3:53 (1:39)               | 4:08 (2:29)               | 3:07 (2:58)               | 3:59 (2:35)               | 3:55 (3:11)               | 4:15 (2:30)               |                                                       |           |       |
| <b>Recovery days off</b>       | I              | 10:48 (2:59)              | 10:25 (2:28)              | 9:58 (2:59)               | 10:44 (2:51)              | 10:27 (1:58)              | 10:40 (2:51)              | -0.87                                                 | -2.65     | 0.91  |
|                                | C              | 9:48 (2:39)               | 9:50 (2:32)               | 9:22 (4:05)               | 10:12 (3:08)              | 11:02 (2:57)              | 10:13 (2:32)              |                                                       |           |       |

† I = Intervention group. C = Control group

**Supplement table D. Data on reported workload and recovery (in hours) at the three measurement points and results from the multilevel mixed model in terms of the interactions between group, time and working area (1 Social services, 2 Technical services, 3 Care and welfare, 4 Call center).**

| Activities (hours)      | Group | Baseline                                        |                                                    |                                                  |                                             | 9 months                                        |                                                    |                                                  |                                             | 18 months                                       |                                                    |                                                  |                                             |
|-------------------------|-------|-------------------------------------------------|----------------------------------------------------|--------------------------------------------------|---------------------------------------------|-------------------------------------------------|----------------------------------------------------|--------------------------------------------------|---------------------------------------------|-------------------------------------------------|----------------------------------------------------|--------------------------------------------------|---------------------------------------------|
|                         |       | Social Services<br>Mean<br>(standard deviation) | Technical Services<br>Mean<br>(standard deviation) | Care and welfare<br>Mean<br>(standard deviation) | Call Center<br>Mean<br>(standard deviation) | Social Services<br>Mean<br>(standard deviation) | Technical Services<br>Mean<br>(standard deviation) | Care and welfare<br>Mean<br>(standard deviation) | Call Center<br>Mean<br>(standard deviation) | Social Services<br>Mean<br>(standard deviation) | Technical Services<br>Mean<br>(standard deviation) | Care and welfare<br>Mean<br>(standard deviation) | Call Center<br>Mean<br>(standard deviation) |
| Paid work workdays      | I†    | 8:00 (1:1)                                      | 7:57 (1:1)                                         | 8:02 (1:1)                                       | 7:43 (1:1)                                  | 6:57 (1:1)                                      | 6:43 (1:1)                                         | 6:18 (1:1)                                       | 6:10 (0:5)                                  | 6:41 (1:0)                                      | 6:30 (1:0)                                         | 6:25 (1:2)                                       | 6:08 (1:0)                                  |
|                         | C†    | 8:04 (1:1)                                      | 8:05 (1:2)                                         | 8:08 (1:0)                                       | 8:11 (1:2)                                  | 7:50 (1:0)                                      | 8:07 (1:2)                                         | 8:16 (1:1)                                       | 7:42 (0:4)                                  | 7:48 (1:1)                                      | 8:04 (1:3)                                         | 8:06 (1:1)                                       | 7:50 (1:1)                                  |
| Non-Paid work workdays  | I     | 1:30 (1:1)                                      | 1:28 (1:0)                                         | 1:44 (1:1)                                       | 2:59 (1:1)                                  | 1:46 (1:2)                                      | 1:46 (1:2)                                         | 2:11 (1:3)                                       | 2:30 (1:3)                                  | 1:58 (1:3)                                      | 1:47 (1:3)                                         | 2:14 (1:2)                                       | 2:13 (1:3)                                  |
|                         | C     | 1:28 (1:2)                                      | 1:40 (1:2)                                         | 1:47 (1:0)                                       | 1:43 (1:2)                                  | 1:26 (1:1)                                      | 1:31 (1:2)                                         | 1:35 (1:1)                                       | 1:29 (1:2)                                  | 1:21 (1:1)                                      | 1:41 (1:2)                                         | 1:27 (1:1)                                       | 1:37 (1:2)                                  |
| Total workload workdays | I     | 9:31 (1:3)                                      | 9:25 (1:2)                                         | 9:47 (1:3)                                       | 9:43 (1:3)                                  | 8:43 (1:4)                                      | 8:30 (1:4)                                         | 8:30 (1:3)                                       | 8:40 (1:3)                                  | 8:40 (1:4)                                      | 8:18 (1:4)                                         | 8:39 (1:4)                                       | 8:22 (1:5)                                  |
|                         | C     | 9:33 (1:3)                                      | 9:45 (1:4)                                         | 9:56 (1:2)                                       | 9:55 (1:4)                                  | 9:16 (1:3)                                      | 9:39 (1:4)                                         | 9:51 (1:2)                                       | 9:12 (1:2)                                  | 9:09 (1:2)                                      | 9:45 (1:4)                                         | 9:24 (1:3)                                       | 9:27 (1:1)                                  |
| Recovery workdays       | I     | 6:35 (1:3)                                      | 6:47 (1:2)                                         | 6:23 (1:3)                                       | 6:40 (1:3)                                  | 7:22 (1:4)                                      | 7:29 (1:4)                                         | 7:27 (1:3)                                       | 7:24 (1:3)                                  | 7:27 (1:4)                                      | 7:41 (1:4)                                         | 7:15 (1:4)                                       | 7:35 (1:4)                                  |
|                         | C     | 6:36 (1:4)                                      | 6:32 (1:5)                                         | 6:03 (1:2)                                       | 6:35 (1:4)                                  | 6:56 (1:3)                                      | 6:53 (1:5)                                         | 6:20 (1:3)                                       | 7:14 (1:4)                                  | 7:11 (1:2)                                      | 6:38 (1:4)                                         | 6:23 (1:4)                                       | 6:50 (1:4)                                  |
| Paid work days off      | I     | 0:10 (0:3)                                      | 0:17 (0:5)                                         | 0:08 (0:2)                                       | 0:17 (0:5)                                  | 0:08 (0:4)                                      | 0:08 (0:3)                                         | 0:10 (0:4)                                       | 0:19 (1:0)                                  | 0:14 (0:5)                                      | 0:13 (0:4)                                         | 0:09 (0:3)                                       | 0:11 (0:3)                                  |
|                         | C     | 0:04 (1:2)                                      | 0:12 (1:4)                                         | 0:16 (0:5)                                       | 0:14 (0:3)                                  | 0:12 (0:3)                                      | 0:29 (1:1)                                         | 0:13 (0:3)                                       | 0:04 (0:1)                                  | 0:14 (0:5)                                      | 0:24 (1:0)                                         | 0:32 (1:3)                                       | 0:04 (0:2)                                  |
| Non-Paid work days off  | I     | 3:33 (2:2)                                      | 2:55 (2:2)                                         | 4:14 (2:3)                                       | 4:03 (2:3)                                  | 3:09 (2:3)                                      | 2:46 (2:1)                                         | 3:43 (2:1)                                       | 3:38 (2:2)                                  | 2:51 (1:2)                                      | 2:52 (2:3)                                         | 3:39 (2:1)                                       | 4:19 (2:4)                                  |
|                         | C     | 3:31 (2:2)                                      | 3:44 (2:5)                                         | 3:46 (2:1)                                       | 3:26 (2:3)                                  | 3:23 (2:3)                                      | 3:21 (2:4)                                         | 3:31 (2:1)                                       | 2:59 (2:4)                                  | 3:16 (2:2)                                      | 3:35 (2:3)                                         | 3:11 (2:1)                                       | 4:20 (3:3)                                  |
| Total workload days off | I     | 3:43 (2:2)                                      | 3:13 (2:2)                                         | 4:22 (2:3)                                       | 4:21 (2:4)                                  | 3:18 (2:4)                                      | 3:55 (2:1)                                         | 3:53 (2:2)                                       | 3:58 (2:1)                                  | 3:06 (2:1)                                      | 3:05 (2:3)                                         | 3:49 (2:1)                                       | 4:30 (2:3)                                  |
|                         | C     | 3:36 (2:2)                                      | 3:57 (2:5)                                         | 4:02 (2:1)                                       | 3:40 (2:2)                                  | 3:36 (2:4)                                      | 3:51 (2:5)                                         | 3:45 (2:0)                                       | 3:03 (2:4)                                  | 3:31 (2:2)                                      | 3:59 (2:3)                                         | 3:44 (2:1)                                       | 4:25 (3:3)                                  |
| Recovery days off       | I     | 10:40 (2:0)                                     | 11:12 (2:4)                                        | 10:10 (2:3)                                      | 10:18 (2:5)                                 | 11:10 (2:5)                                     | 11:01 (3:2)                                        | 10:38 (2:2)                                      | 10:18 (2:2)                                 | 11:13 (2:2)                                     | 11:15 (3:0)                                        | 10:33 (2:1)                                      | 9:58 (3:0)                                  |
|                         | C     | 10:06 (3:1)                                     | 9:38 (4:2)                                         | 9:54 (2:5)                                       | 11:23 (2:3)                                 | 10:30 (3:2)                                     | 10:18 (3:3)                                        | 10:18 (2:1)                                      | 11:41 (3:1)                                 | 10:52 (2:4)                                     | 10:26 (2:5)                                        | 10:17 (2:2)                                      | 10:01 (4:0)                                 |

| Interaction effects     | Coefficient | C. I. 95% |       |
|-------------------------|-------------|-----------|-------|
|                         |             | Lower     | Upper |
| Paid work workdays      | 0.02        | -0.10     | 0.14  |
| Non-Paid work workdays  | -0.10       | -0.21     | 0.01  |
| Total workload workdays | -0.09       | -0.22     | 0.05  |
| Recovery workdays       | 0.07        | -0.07     | 0.21  |
| Paid work days off      | 0.01        | -0.08     | 0.10  |
| Non-Paid work days off  | 0.01        | 0.23      | 2.25  |
| Total workload days off | 0.01        | 0.23      | 2.25  |
| Recovery days off       | -0.06       | -0.37     | 0.25  |

† I = Intervention group. C = Control group

**Supplement table E. Data on reported workload and recovery (in hours) at the three measurement points and results from the multilevel mixed model in terms of the interactions between group, time and shift work<sup>a</sup> (1 yes, 0 no).**

| Activities<br>(hours)          | Group          | Baseline                                      |                                            | 9 months                                      |                                            | 18 months                                     |                                            | Interaction effects<br>Group*Time*Shift work |                |              |
|--------------------------------|----------------|-----------------------------------------------|--------------------------------------------|-----------------------------------------------|--------------------------------------------|-----------------------------------------------|--------------------------------------------|----------------------------------------------|----------------|--------------|
|                                |                | No shift work<br>Mean (standard<br>deviation) | Shift work<br>Mean (standard<br>deviation) | No shift work<br>Mean (standard<br>deviation) | Shift work<br>Mean (standard<br>deviation) | No shift work<br>Mean (standard<br>deviation) | Shift work<br>Mean (standard<br>deviation) | Coefficient                                  | C. I.<br>Lower | 95%<br>Upper |
| <b>Paid work workdays</b>      | I <sup>†</sup> | 7:54 (1:10)                                   | 8:08 (1:12)                                | 6:29 (1:00)                                   | 6:54 (1:20)                                | 6:24 (1:02)                                   | 6:40 (1:17)                                | 0.16                                         | -0.14          | 0.47         |
|                                | C <sup>†</sup> | 8:09 (1:09)                                   | 8:05 (1:19)                                | 7:57 (1:05)                                   | 8:05 (1:30)                                | 7:56 (1:12)                                   | 7:49 (1:36)                                |                                              |                |              |
| <b>Non-Paid work workdays</b>  | I              | 1:38 (1:03)                                   | 1:34 (1:11)                                | 2:00 (1:22)                                   | 1:55 (1:37)                                | 2:01 (1:23)                                   | 1:51 (1:28)                                | -0.20                                        | -0.47          | 0.07         |
|                                | C              | 1:37 (1:14)                                   | 1:42 (1:22)                                | 1:33 (1:19)                                   | 1:30 (1:14)                                | 1:26 (1:12)                                   | 1:50 (1:23)                                |                                              |                |              |
| <b>Total workload workdays</b> | I              | 9:33 (1:21)                                   | 9:42 (1:28)                                | 8:29 (1:31)                                   | 8:49 (1:57)                                | 8:25 (1:38)                                   | 8:31 (2:05)                                | -0.03                                        | -0.37          | 0.31         |
|                                | C              | 9:47 (1:27)                                   | 9:47 (1:27)                                | 9:31 (1:29)                                   | 9:36 (1:36)                                | 9:22 (1:25)                                   | 9:39 (1:43)                                |                                              |                |              |
| <b>Recovery workdays</b>       | I              | 6:40 (1:28)                                   | 6:25 (1:20)                                | 7:33 (1:31)                                   | 7:12 (1:51)                                | 7:36 (1:37)                                   | 7:15 (1:55)                                | -0.02                                        | -0.38          | 0.35         |
|                                | C              | 6:24 (1:34)                                   | 6:36 (1:55)                                | 6:45 (1:28)                                   | 6:58 (1:49)                                | 6:52 (1:35)                                   | 6:40 (1:45)                                |                                              |                |              |
| <b>Paid work days off</b>      | I              | 0:13 (0:39)                                   | 0:11 (0:29)                                | 0:09 (0:37)                                   | 0:11 (0:31)                                | 0:11 (0:42)                                   | 0:18 (0:42)                                | 0.05                                         | -0.17          | 0.26         |
|                                | C              | 0:05 (0:20)                                   | 0:19 (0:50)                                | 0:08 (0:27)                                   | 0:23 (0:48)                                | 0:17 (1:02)                                   | 0:35 (1:10)                                |                                              |                |              |
| <b>Non-Paid work days off</b>  | I              | 3:40 (2:18)                                   | 3:49 (2:51)                                | 3:15 (2:06)                                   | 3:34 (2:43)                                | 3:21 (2:18)                                   | 3:05 (2:42)                                | 0.05                                         | -0.57          | 0.67         |
|                                | C              | 3:42 (2:19)                                   | 3:40 (2:32)                                | 3:09 (2:23)                                   | 3:45 (2:29)                                | 3:39 (2:35)                                   | 3:01 (2:24)                                |                                              |                |              |
| <b>Total workload days off</b> | I              | 3:53 (2:20)                                   | 4:00 (2:54)                                | 3:25 (2:05)                                   | 3:46 (2:47)                                | 3:33 (2:21)                                   | 3:23 (2:38)                                | 0.11                                         | 0.51           | 0.73         |
|                                | C              | 3:47 (2:18)                                   | 4:00 (2:34)                                | 3:18 (2:19)                                   | 4:09 (2:37)                                | 3:56 (2:36)                                   | 3:37 (2:21)                                |                                              |                |              |
| <b>Recovery days off</b>       | I              | 10:33 (2:10)                                  | 10:41 (3:03)                               | 10:58 (2:36)                                  | 10:18 (3:24)                               | 10:55 (2:35)                                  | 10:42 (3:19)                               | -0.50                                        | -1.23          | 0.29         |
|                                | C              | 10:34 (2:46)                                  | 9:12 (4:31)                                | 10:47 (3:04)                                  | 10:00 (3:25)                               | 10:38 (2:39)                                  | 9:50 (3:15)                                |                                              |                |              |

a) Employees reporting normal work hours during evening and/or night in the questionnaire at all three measurement periods

† I = Intervention group. C = Control group
